# Supplementary material for: In Silico Transcriptomic Expression of MSR1 in Solid Tumors Is Associated with Responses to Anti-PD1 and Anti-CTLA4 Therapies
Source: MDPI journal article supplement (doi:10.3390/ijms25073987), 2024-04-03
Supplement: s1 [file s1]

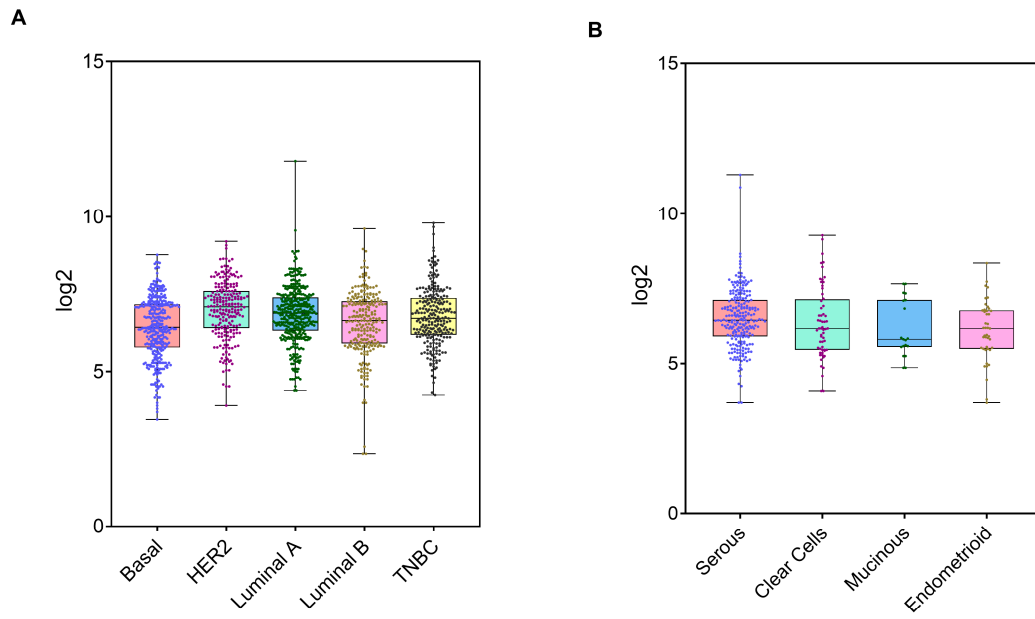

**Supplementary Figure S1. Expression data obtained from GENT2. This web tool implies expression levels with the MAS5 algorithm which allows the comparison between independent datasets. a) *MSR1* expression data on breast cancer subtypes. B) *MSR1* expression data on ovarian cancer subtypes.**

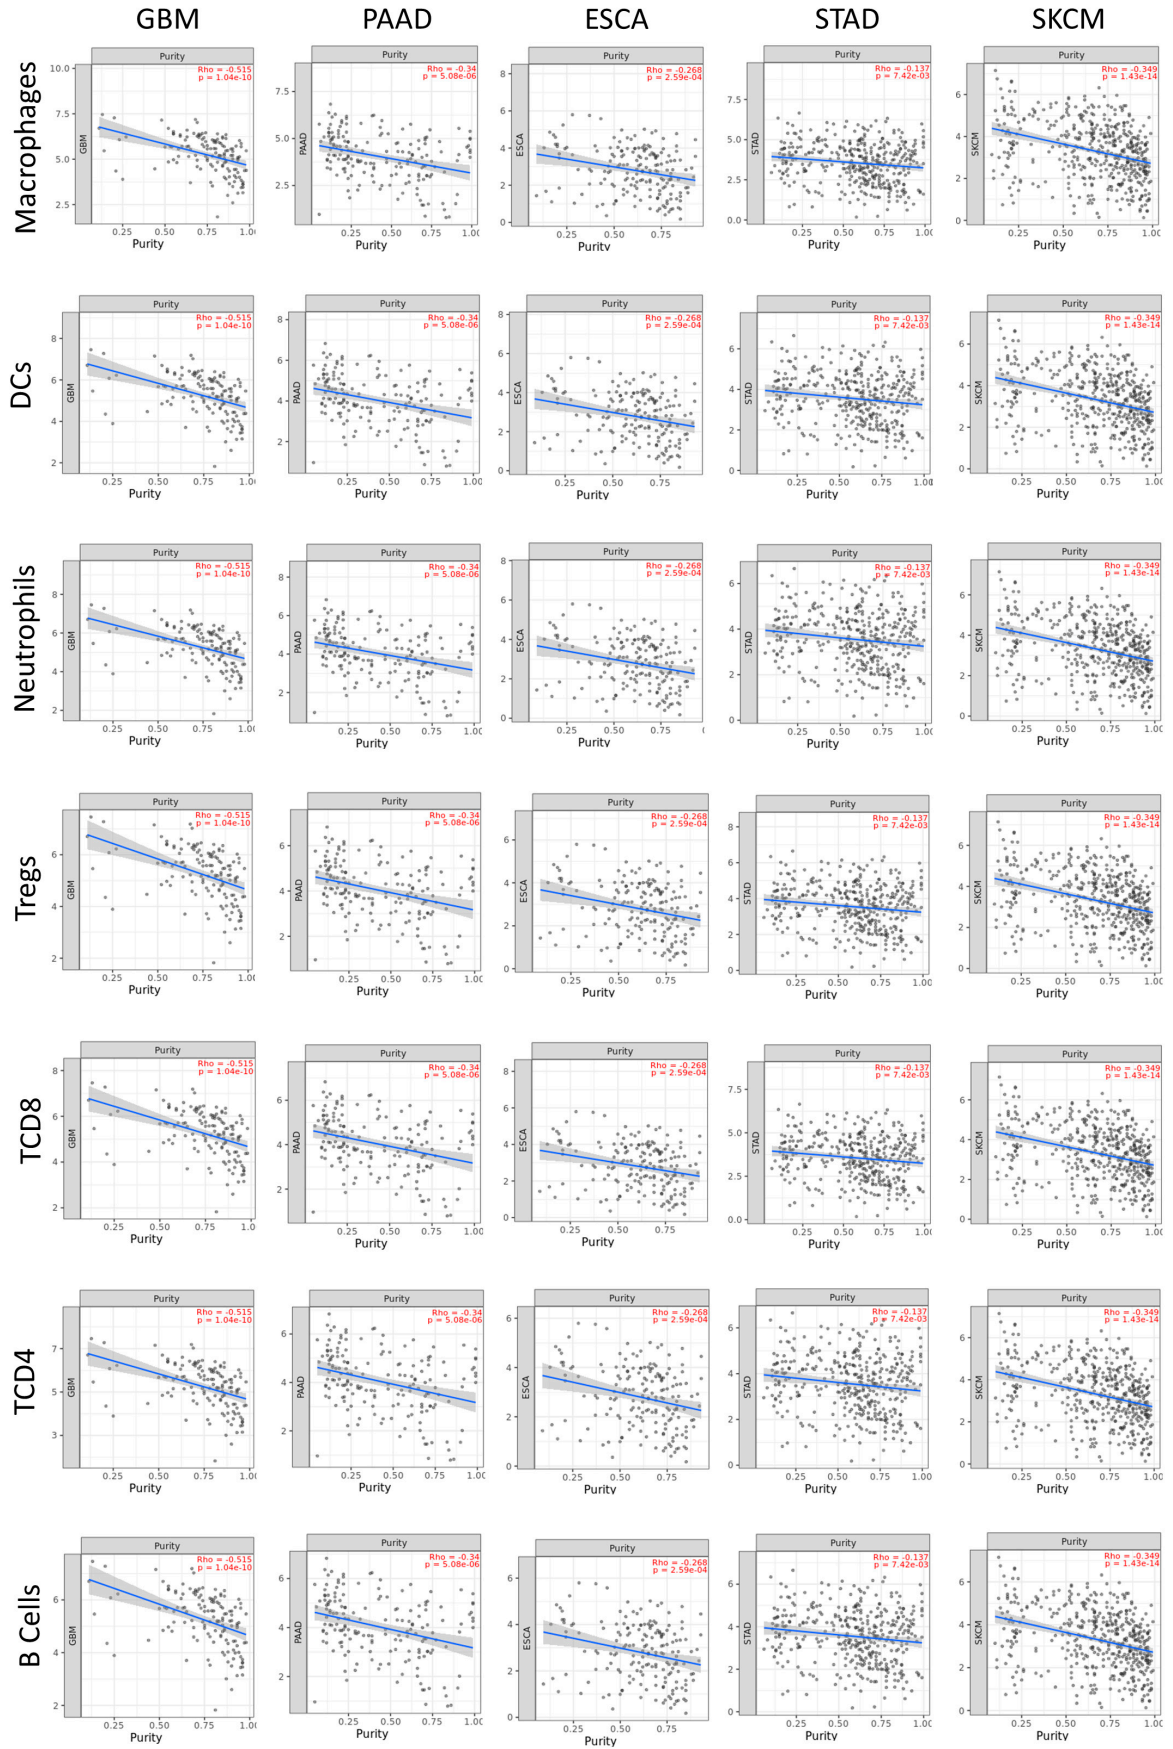

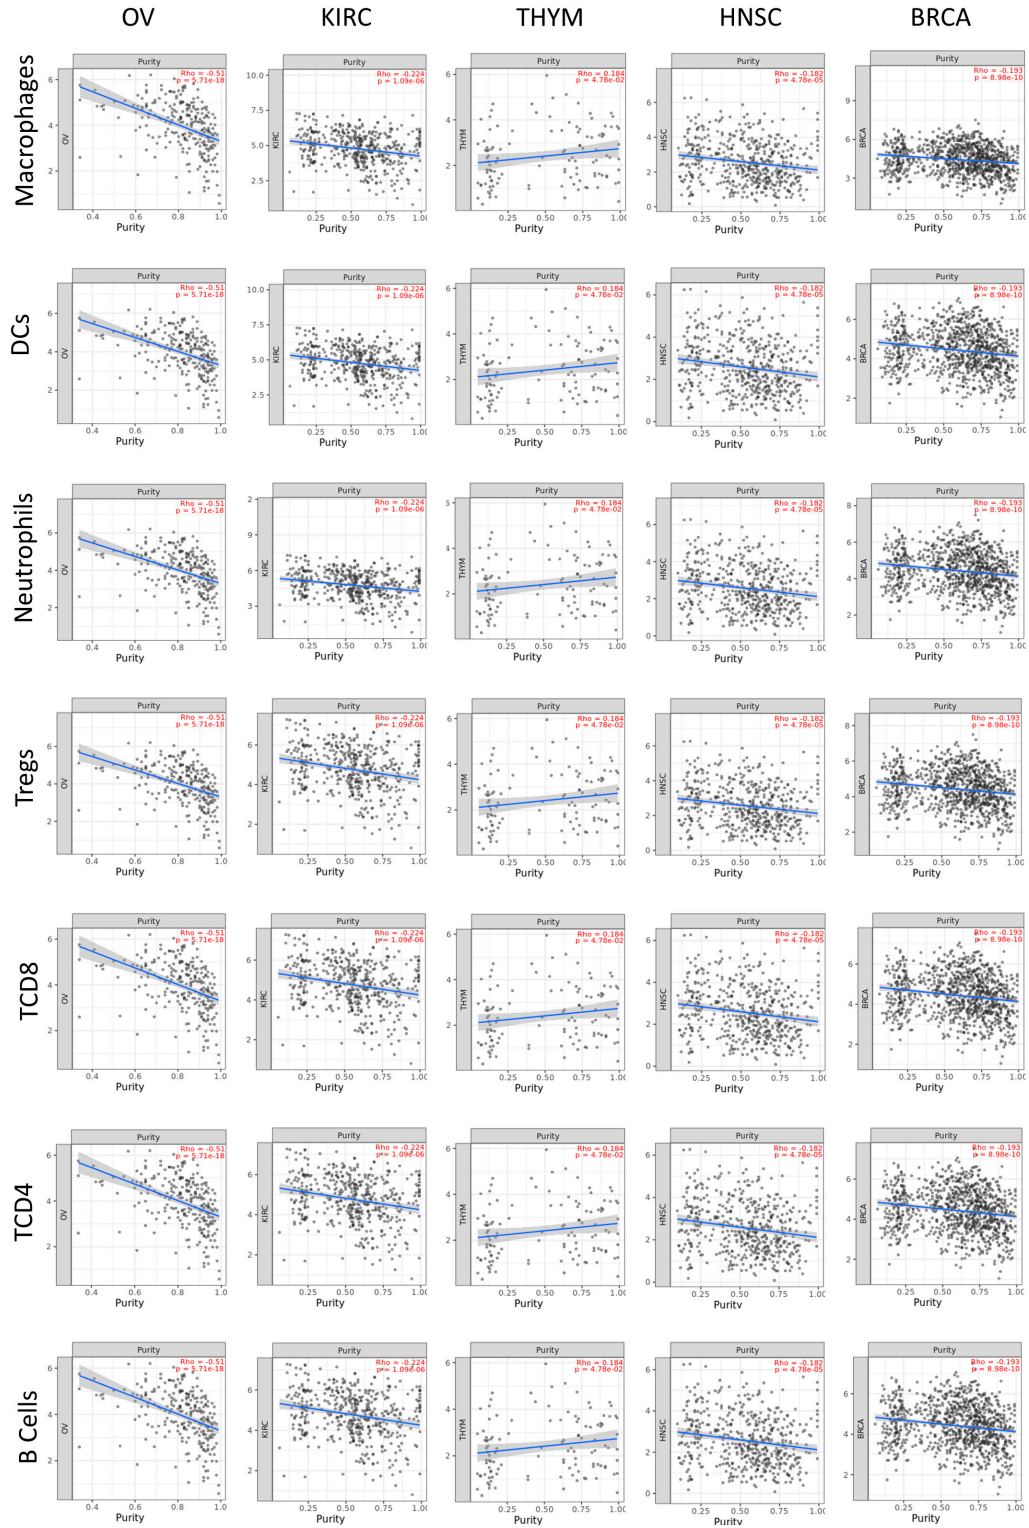

**Supplementary Figure S2.** Dot plots for the purity in relation to the immune populations in the ten selected tumor types. *MSR1* expression is represented in the y axes as log2 (TPM) and purity level in the x axis.

| Web Tool            | GEPIA2                                                                                                                                                                                                                                                             | GENT2                                                                             | CBIOPORTAL                                                                            | KM PLOTTER                                                                                                                                                                                                                                                                                                                                          | TIMER2.0                                                                                                                                                                            | ROC PLOTTER                                                                                                                                                                                                                                                                                                                                         |
|---------------------|--------------------------------------------------------------------------------------------------------------------------------------------------------------------------------------------------------------------------------------------------------------------|-----------------------------------------------------------------------------------|---------------------------------------------------------------------------------------|-----------------------------------------------------------------------------------------------------------------------------------------------------------------------------------------------------------------------------------------------------------------------------------------------------------------------------------------------------|-------------------------------------------------------------------------------------------------------------------------------------------------------------------------------------|-----------------------------------------------------------------------------------------------------------------------------------------------------------------------------------------------------------------------------------------------------------------------------------------------------------------------------------------------------|
| Data sets contained | TCGA and GTEx                                                                                                                                                                                                                                                      | GEO                                                                               | Several data sets                                                                     | GEO, EGA andTCGA                                                                                                                                                                                                                                                                                                                                    | TCGA                                                                                                                                                                                | GEO, EGA andTCGA                                                                                                                                                                                                                                                                                                                                    |
| Link                | <a href="https://www.cancer.gov/about-nci/organization/cg/research/structural-genomics/tcga">https://www.cancer.gov/about-nci/organization/cg/research/structural-genomics/tcga</a><br><br><a href="https://gtexportal.org/home/">https://gtexportal.org/home/</a> | <a href="https://www.ncbi.nlm.nih.gov/geo/">https://www.ncbi.nlm.nih.gov/geo/</a> | <a href="https://www.cbioportal.org/datasets">https://www.cbioportal.org/datasets</a> | <a href="https://www.ncbi.nlm.nih.gov/geo/">https://www.ncbi.nlm.nih.gov/geo/</a><br><br><a href="https://ega-archive.org/">https://ega-archive.org/</a><br><br><a href="https://www.cancer.gov/about-nci/organization/cg/research/structural-genomics/tcga">https://www.cancer.gov/about-nci/organization/cg/research/structural-genomics/tcga</a> | <a href="https://www.cancer.gov/about-nci/organization/cg/research/structural-genomics/tcga">https://www.cancer.gov/about-nci/organization/cg/research/structural-genomics/tcga</a> | <a href="https://www.ncbi.nlm.nih.gov/geo/">https://www.ncbi.nlm.nih.gov/geo/</a><br><br><a href="https://ega-archive.org/">https://ega-archive.org/</a><br><br><a href="https://www.cancer.gov/about-nci/organization/cg/research/structural-genomics/tcga">https://www.cancer.gov/about-nci/organization/cg/research/structural-genomics/tcga</a> |

Supplementary Table S1. Table containing information about the data sets used and original source.
